# Supplementary material for: Fatty Acids as a Tool to Understand Microbial Diversity and Their Role in Food Webs of Mediterranean Temporary Ponds
Source: PubMed Central journal article supplement (PMC6271346; doi:10.3390/molecules19055570), 2014-04-30
Supplement: molecules-19-05570-s001.pdf [file molecules-19-05570-s001.pdf]

# Supplementary Materials

**Table S1.** Fatty acid (FA) composition of seston (fraction < 125  $\mu\text{m}$ ) and zooplankton crustacea in Torrão pond. Reserve lipids are the sum of apolar and acetone mobile lipid fractions plus free fatty acids.

| Torrao                            | Filter | Cladocera               |                |                                 |                |                          |                | Large Branchiopods              |                |
|-----------------------------------|--------|-------------------------|----------------|---------------------------------|----------------|--------------------------|----------------|---------------------------------|----------------|
|                                   |        | <i>Simocephalus</i> sp. |                | <i>Ceriodaphnia quadrangula</i> |                | <i>Daphnia hispanica</i> |                | <i>Chirocephalus diaphnanus</i> |                |
|                                   |        | Reserve lipids          | Phospho-lipids | Reserve lipids                  | Phospho-lipids | Reserve lipids           | Phospho-lipids | Reserve lipids                  | Phospho-lipids |
| 10:0                              | 0.00   | 0.32                    | 0.26           | 2.54                            | 0.00           | 0.92                     | 0.00           | 0.40                            | 0.04           |
| 12:0                              | 2.37   | 3.61                    | 1.15           | 3.98                            | 0.00           | 3.84                     | 2.01           | 4.01                            | 0.26           |
| 14:0                              | 7.75   | 2.40                    | 1.10           | 2.34                            | 0.71           | 2.50                     | 0.73           | 2.19                            | 0.61           |
| 16:0                              | 19.36  | 5.86                    | 12.12          | 9.00                            | 7.32           | 7.91                     | 8.52           | 7.21                            | 10.98          |
| 18:0                              | 16.47  | 1.38                    | 4.59           | 4.56                            | 1.66           | 2.93                     | 3.20           | 3.45                            | 5.49           |
| $\Sigma$ Saturated (without 15:0) | 50.28  | 13.87                   | 20.24          | 22.41                           | 10.26          | 19.61                    | 15.38          | 19.65                           | 18.50          |
| 15:1 $\omega$ 8                   | 0.00   | 0.00                    | 0.00           | 1.59                            | 0.20           | 1.08                     | 0.00           | 0.45                            | 0.00           |
| 16:1 $\omega$ 4 (Diatoms)         | 0.00   | 0.00                    | 0.00           | 0.00                            | 0.00           | 0.13                     | 0.00           | 0.13                            | 0.00           |
| 16:1 $\omega$ 5 (Fungi)           | 0.78   | 0.39                    | 0.38           | 0.21                            | 0.08           | 0.89                     | 0.23           | 0.73                            | 0.55           |
| 16:1 $\omega$ 7 *                 | 2.79   | 19.99                   | 8.97           | 10.70                           | 34.73          | 13.01                    | 11.63          | 17.58                           | 7.16           |
| 16:1 $\omega$ 9 *                 | 0.50   | 0.00                    | 0.00           | 0.00                            | 0.00           | 2.37                     | 4.01           | 0.41                            | 0.00           |
| 18:1 $\omega$ 7 *                 | 3.15   | 0.00                    | 5.42           | 0.74                            | 1.52           | 0.31                     | 7.07           | 0.10                            | 3.23           |
| 18:1 $\omega$ 9 *                 | 13.03  | 0.14                    | 10.67          | 2.33                            | 5.88           | 2.07                     | 9.46           | 4.92                            | 25.12          |
| $\Sigma$ Mono-unsaturated         | 20.26  | 31.25                   | 36.27          | 28.34                           | 44.66          | 34.69                    | 35.43          | 33.65                           | 38.83          |
| $\Sigma$ Bacterial FA             | 22.75  | 8.95                    | 8.95           | 13.99                           | 13.99          | 17.20                    | 17.20          | 14.42                           | 14.42          |
| 16:2 $\omega$ 4                   | 0.43   | 0.00                    | 0.00           | 0.00                            | 0.00           | 0.00                     | 0.00           | 0.00                            | 0.00           |
| 16:3 $\omega$ 4                   | 2.07   | 0.00                    | 0.00           | 0.00                            | 0.00           | 0.00                     | 0.00           | 0.00                            | 0.00           |
| 16:3 $\omega$ 6                   | 0.00   | 0.00                    | 0.00           | 0.00                            | 0.00           | 0.00                     | 0.00           | 0.00                            | 0.00           |
| 18:2 $\omega$ 6                   | 4.02   | 1.78                    | 5.58           | 1.20                            | 0.69           | 2.15                     | 2.67           | 1.97                            | 4.92           |
| 18:3 $\omega$ 3                   | 1.20   | 28.99                   | 11.35          | 16.00                           | 8.20           | 14.76                    | 20.36          | 15.54                           | 3.11           |
| 20:4 $\omega$ 6                   | 1.08   | 0.88                    | 6.53           | 0.13                            | 0.97           | 0.75                     | 3.21           | 1.02                            | 5.86           |
| 20:5 $\omega$ 3                   | 2.34   | 2.22                    | 11.07          | 0.52                            | 4.60           | 2.57                     | 8.47           | 3.93                            | 20.55          |
| 22:5 $\omega$ 3                   | 0.11   | 0.12                    | 0.00           | 0.72                            | 0.17           | 0.57                     | 0.20           | 1.15                            | 0.29           |
| 22:6 $\omega$ 3                   | 1.50   | 0.00                    | 1.20           | 0.10                            | 0.27           | 0.13                     | 0.11           | 0.52                            | 2.15           |
| $\Sigma$ PUFA                     | 12.76  | 33.99                   | 35.74          | 18.68                           | 14.90          | 20.93                    | 35.02          | 24.12                           | 36.89          |
| $\Sigma$ C>24                     | 0.00   | 0.00                    | 0.00           | 0.66                            | 0.00           | 0.81                     | 4.50           | 1.43                            | 0.57           |
| $\Sigma$ $\omega$ 3               | 5.31   | 31.33                   | 31.33          | 17.35                           | 17.35          | 18.03                    | 18.03          | 21.13                           | 21.13          |
| $\omega$ 3/ $\omega$ 6            | 1.04   | 11.78                   | 11.78          | 13.01                           | 13.01          | 6.22                     | 6.22           | 7.07                            | 7.07           |

\* includes FA measured as DMA, likely to resulting from vinyl bonds with glycerol. Bacterial FA are the sum of iso-, antiso, 10-Methyl and cyclo FA, 15:0, and 16:1 $\omega$ 8.

**Table S2.** Fatty acid (FA) composition of seston (fraction < 125 µm) and zooplankton crustacea in Bunho pond. Reserve lipids are the sum of apolar and acetone mobile lipid fractions plus free fatty acids.

| Bunho                      | Filter | Cladocera               |                |                        |                |                                |                |                          |                |
|----------------------------|--------|-------------------------|----------------|------------------------|----------------|--------------------------------|----------------|--------------------------|----------------|
|                            |        | <i>Simocephalus</i> sp. |                | <i>Moina brachiata</i> |                | <i>Ceriodaphnia reticulata</i> |                | <i>Daphnia hispanica</i> |                |
|                            |        | Reserve lipids          | Phospho-lipids | Reserve lipids         | Phospho-lipids | Reserve lipids                 | Phospho-lipids | Reserve lipids           | Phospho-lipids |
| 10:0                       | 0.00   | 0.00                    | 0.00           | 0.00                   | 0.00           | 0.00                           | 0.00           | 0.27                     | 0.23           |
| 12:0                       | 2.05   | 6.53                    | 0.00           | 7.23                   | 0.00           | 5.58                           | 0.00           | 5.88                     | 1.08           |
| 14:0                       | 5.51   | 2.20                    | 0.94           | 3.35                   | 1.02           | 3.30                           | 0.93           | 2.73                     | 1.55           |
| 16:0                       | 18.17  | 6.87                    | 15.55          | 14.69                  | 12.79          | 14.43                          | 15.90          | 12.32                    | 15.16          |
| 18:0                       | 5.10   | 5.78                    | 5.31           | 8.25                   | 7.61           | 5.75                           | 6.65           | 6.07                     | 7.43           |
| ∑ Saturated (without 15:0) | 35.64  | 22.88                   | 22.91          | 34.96                  | 22.99          | 29.06                          | 24.81          | 28.53                    | 28.33          |
| 15:1ω8                     | 0.00   | 1.89                    | 0.00           | 1.03                   | 0.00           | 1.75                           | 0.00           | 1.50                     | 0.00           |
| 16:1ω4 (Diatoms)           | 0.00   | 0.48                    | 0.00           | 0.00                   | 0.00           | 0.00                           | 0.00           | 0.17                     | 0.00           |
| 16:1ω5 (Fungi)             | 0.68   | 0.39                    | 0.00           | 0.00                   | 0.38           | 1.20                           | 0.28           | 0.61                     | 0.20           |
| 16:1ω7 *                   | 2.39   | 11.63                   | 4.44           | 5.83                   | 8.23           | 16.85                          | 7.06           | 10.11                    | 6.04           |
| 16:1ω9 *                   | 15.92  | 0.26                    | 0.00           | 3.20                   | 0.00           | 0.00                           | 1.61           | 0.00                     | 3.30           |
| 18:1ω7 *                   | 12.55  | 0.25                    | 0.00           | 0.00                   | 8.36           | 0.00                           | 4.89           | 0.08                     | 1.83           |
| 18:1ω9 *                   | 6.59   | 3.35                    | 14.81          | 8.51                   | 11.99          | 4.69                           | 22.43          | 3.88                     | 15.51          |
| ∑ Mono-unsaturated         | 40.84  | 32.87                   | 30.80          | 31.03                  | 31.03          | 29.96                          | 37.35          | 28.55                    | 31.38          |
| ∑ Bacterial FA             | 36.78  | 22.05                   | 22.05          | 12.25                  | 12.25          | 18.99                          | 18.99          | 15.50                    | 15.50          |
| 16:2ω4                     | 0.00   | 0.00                    | 0.00           | 0.00                   | 0.00           | 0.00                           | 0.00           | 0.00                     | 0.00           |
| 16:3ω4                     | 0.00   | 0.00                    | 0.00           | 0.00                   | 0.00           | 0.00                           | 0.00           | 0.00                     | 0.00           |
| 16:3ω6                     | 0.00   | 0.00                    | 0.00           | 0.66                   | 0.00           | 0.54                           | 0.00           | 0.20                     | 0.00           |
| 18:2ω6                     | 5.20   | 1.83                    | 5.22           | 2.31                   | 5.43           | 4.57                           | 7.63           | 3.47                     | 4.39           |
| 18:3ω3                     | 3.11   | 7.14                    | 1.11           | 10.75                  | 1.21           | 6.68                           | 1.36           | 7.89                     | 1.38           |
| 20:4ω6                     | 1.95   | 0.52                    | 6.31           | 1.59                   | 9.16           | 1.20                           | 7.41           | 1.05                     | 5.52           |
| 20:5ω3                     | 3.49   | 0.97                    | 12.67          | 2.95                   | 17.25          | 2.70                           | 14.51          | 3.81                     | 15.05          |
| 22:5ω3                     | 0.00   | 3.16                    | 0.00           | 4.91                   | 0.64           | 3.82                           | 0.28           | 2.92                     | 0.60           |
| 22:6ω3                     | 1.29   | 0.27                    | 2.72           | 0.00                   | 1.83           | 1.02                           | 2.19           | 1.27                     | 6.38           |
| ∑ PUFA                     | 15.03  | 13.89                   | 28.04          | 23.16                  | 35.51          | 20.51                          | 33.38          | 20.60                    | 33.33          |
| ∑ C>24                     | 0.00   | 2.02                    | 17.28          | 0.92                   | 0.00           | 0.00                           | 0.00           | 3.09                     | 1.69           |
| ∑ ω3                       | 7.89   | 11.54                   | 11.54          | 18.61                  | 18.61          | 14.22                          | 14.22          | 15.88                    | 15.88          |
| ω3/ω6                      | 1.10   | 4.91                    | 4.91           | 4.09                   | 4.09           | 2.26                           | 2.26           | 3.37                     | 3.37           |

\* includes FA measured as DMA, likely to resulting from vinyl bonds with glycerol. Bacterial FA are the sum of iso-, antiso, 10-Methyl and cyclo FA, 15:0, and 16:1ω8.

**Table S3.** Fatty acid (FA) composition of seston (fraction < 125 µm) and zooplankton crustacea in Sector A pond. Reserve lipids are the sum of apolar and acetone mobile lipid fractions plus free fatty acids.

| Sector A                      | Filter | Cladocera                      |                | Large Branchiopods              |                |                           |                |
|-------------------------------|--------|--------------------------------|----------------|---------------------------------|----------------|---------------------------|----------------|
|                               |        | <i>Ceriodaphnia reticulata</i> |                | <i>Chirocephalus diaphnanus</i> |                | <i>Branchipus cortesi</i> |                |
|                               |        | Reserve lipids                 | Phospho-lipids | Reserve lipids                  | Phospho-lipids | Reserve lipids            | Phospho-lipids |
| 10:0                          | 0.00   | 0.67                           | 0.00           | 3.09                            | 0.00           | 1.84                      | 0.00           |
| 12:0                          | 2.64   | 8.68                           | 1.04           | 3.96                            | 1.07           | 3.21                      | 0.41           |
| 14:0                          | 4.75   | 2.27                           | 2.26           | 1.55                            | 0.59           | 1.19                      | 0.28           |
| 16:0                          | 26.47  | 11.25                          | 15.20          | 5.59                            | 10.69          | 5.72                      | 4.42           |
| 18:0                          | 15.53  | 6.50                           | 6.44           | 2.41                            | 3.90           | 1.88                      | 2.26           |
| ∑ Saturated<br>(without 15:0) | 50.39  | 35.53                          | 26.26          | 17.45                           | 17.27          | 14.18                     | 7.78           |
| 15:1ω8                        | 0.00   | 1.54                           | 0.00           | 1.29                            | 0.00           | 0.72                      | 0.00           |
| 16:1ω4 (Diatoms)              | 0.00   | 0.00                           | 0.00           | 0.00                            | 0.00           | 0.00                      | 0.00           |
| 16:1ω5 (Fungi)                | 2.71   | 0.00                           | 0.00           | 1.20                            | 0.41           | 0.89                      | 0.27           |
| 16:1ω7 *                      | 6.14   | 7.66                           | 5.52           | 13.91                           | 12.54          | 14.26                     | 17.64          |
| 16:1ω9 *                      | 0.00   | 2.69                           | 0.00           | 0.19                            | 0.00           | 0.00                      | 0.00           |
| 18:1ω7 *                      | 5.04   | 0.00                           | 6.30           | 0.06                            | 6.37           | 0.00                      | 4.34           |
| 18:1ω9 *                      | 8.45   | 5.62                           | 7.59           | 4.27                            | 16.43          | 6.51                      | 9.07           |
| ∑ Mono-unsaturated            | 22.35  | 21.21                          | 25.37          | 35.93                           | 38.82          | 34.19                     | 42.30          |
| ∑ Bacterial FA                | 18.67  | 12.24                          | 12.24          | 15.85                           | 15.85          | 14.60                     | 14.60          |
| 16:2ω4                        | 0.00   | 0.00                           | 0.00           | 0.00                            | 0.00           | 0.00                      | 0.00           |
| 16:3ω4                        | 3.00   | 0.00                           | 0.00           | 0.00                            | 0.00           | 0.00                      | 0.00           |
| 16:3ω6                        | 0.00   | 0.00                           | 0.00           | 0.20                            | 0.00           | 0.27                      | 0.00           |
| 18:2ω6                        | 3.50   | 2.33                           | 4.73           | 2.11                            | 3.72           | 2.08                      | 2.12           |
| 18:3ω3                        | 0.00   | 10.23                          | 1.96           | 15.77                           | 12.97          | 16.48                     | 4.54           |
| 20:4ω6                        | 0.00   | 0.00                           | 8.29           | 1.12                            | 5.78           | 1.26                      | 5.69           |
| 20:5ω3                        | 1.87   | 1.41                           | 16.48          | 2.80                            | 12.08          | 2.88                      | 8.68           |
| 22:5ω3                        | 0.00   | 4.27                           | 0.00           | 0.34                            | 0.00           | 0.23                      | 0.00           |
| 22:6ω3                        | 0.00   | 0.40                           | 10.67          | 0.64                            | 0.79           | 0.46                      | 0.38           |
| ∑ PUFA                        | 8.36   | 18.63                          | 42.14          | 22.98                           | 35.34          | 23.66                     | 21.42          |
| ∑ C>24                        | 0.00   | 2.03                           | 0.00           | 0.50                            | 0.00           | 6.79                      | 0.00           |
| ∑ ω3                          | 1.87   | 16.30                          | 16.30          | 19.54                           | 19.54          | 20.05                     | 20.05          |
| ω3/ω6                         | 0.36   | 6.98                           | 6.98           | 5.69                            | 5.69           | 5.56                      | 5.56           |

\* includes FA measured as DMA, likely to resulting from vinyl bonds with glycerol. Bacterial FA are the sum of iso-, antiso, 10-Methyl and cyclo FA, 15:0, and 16:1ω8.

**Table S4.** Fatty acid (FA) composition of seston (fraction < 125  $\mu\text{m}$ ) and zooplankton crustacea in Sector B pond. Reserve lipids are the sum of apolar and acetone mobile lipid fractions plus free fatty acids.

| Sector B                          | Filter | Cladocera               |                |                          |                | Large Branchiopods              |                |
|-----------------------------------|--------|-------------------------|----------------|--------------------------|----------------|---------------------------------|----------------|
|                                   |        | <i>Simocephalus</i> sp. |                | <i>Daphnia hispanica</i> |                | <i>Chirocephalus diaphnanus</i> |                |
|                                   |        | Reserve lipids          | Phospho-lipids | Reserve lipids           | Phospho-lipids | Reserve lipids                  | Phospho-lipids |
| 10:0                              | 0.00   | 0.16                    | 0.13           | 0.59                     | 0.11           | 0.07                            | 0.04           |
| 12:0                              | 13.44  | 5.07                    | 0.57           | 4.86                     | 1.54           | 3.47                            | 0.25           |
| 14:0                              | 8.98   | 2.30                    | 1.02           | 2.61                     | 1.14           | 1.53                            | 0.91           |
| 16:0                              | 12.50  | 6.36                    | 13.83          | 10.11                    | 11.84          | 6.36                            | 12.28          |
| 18:0                              | 13.76  | 3.58                    | 4.95           | 4.50                     | 5.31           | 3.23                            | 5.00           |
| $\Sigma$ Saturated (without 15:0) | 48.68  | 18.38                   | 21.58          | 24.07                    | 21.86          | 15.75                           | 19.71          |
| 15:1 $\omega$ 8                   | 0.00   | 0.94                    | 0.00           | 1.29                     | 0.00           | 0.77                            | 0.00           |
| 16:1 $\omega$ 4 (Diatoms)         | 0.00   | 0.24                    | 0.00           | 0.15                     | 0.00           | 0.12                            | 0.00           |
| 16:1 $\omega$ 5 (Fungi)           | 3.40   | 0.39                    | 0.19           | 0.75                     | 0.22           | 0.74                            | 0.48           |
| 16:1 $\omega$ 7 *                 | 3.20   | 15.81                   | 6.71           | 11.56                    | 8.83           | 15.87                           | 4.54           |
| 16:1 $\omega$ 9 *                 | 9.97   | 0.13                    | 0.00           | 1.19                     | 3.65           | 0.32                            | 0.00           |
| 18:1 $\omega$ 7 *                 | 5.48   | 0.13                    | 2.71           | 0.19                     | 4.45           | 0.00                            | 0.00           |
| 18:1 $\omega$ 9 *                 | 3.69   | 1.75                    | 12.74          | 2.97                     | 12.48          | 4.96                            | 29.24          |
| $\Sigma$ Mono-unsaturated         | 37.22  | 32.06                   | 33.53          | 31.62                    | 33.40          | 35.33                           | 35.99          |
| $\Sigma$ Bacterial FA             | 21.14  | 15.50                   | 15.50          | 16.63                    | 16.63          | 14.14                           | 14.14          |
| 16:2 $\omega$ 4                   | 0.00   | 0.00                    | 0.00           | 0.00                     | 0.00           | 0.00                            | 0.00           |
| 16:3 $\omega$ 4                   | 4.83   | 0.00                    | 0.00           | 0.00                     | 0.00           | 0.00                            | 0.00           |
| 16:3 $\omega$ 6                   | 0.00   | 0.00                    | 0.00           | 0.10                     | 0.00           | 0.25                            | 0.00           |
| 18:2 $\omega$ 6                   | 0.00   | 1.80                    | 5.40           | 2.81                     | 3.53           | 2.16                            | 5.28           |
| 18:3 $\omega$ 3                   | 12.35  | 18.07                   | 6.23           | 11.32                    | 10.87          | 15.94                           | 4.38           |
| 20:4 $\omega$ 6                   | 0.00   | 0.70                    | 6.42           | 0.90                     | 4.37           | 1.19                            | 6.91           |
| 20:5 $\omega$ 3                   | 0.00   | 1.60                    | 11.87          | 3.19                     | 11.76          | 3.37                            | 19.22          |
| 22:5 $\omega$ 3                   | 1.51   | 1.64                    | 0.00           | 1.74                     | 0.40           | 0.54                            | 0.14           |
| 22:6 $\omega$ 3                   | 0.00   | 0.13                    | 1.96           | 0.70                     | 3.25           | 0.60                            | 2.89           |
| $\Sigma$ PUFA                     | 18.68  | 23.94                   | 31.89          | 20.77                    | 34.18          | 24.04                           | 38.83          |
| $\Sigma$ C>24                     | 0.00   | 1.01                    | 8.64           | 1.95                     | 3.09           | 1.49                            | 0.12           |
| $\Sigma$ $\omega$ 3               | 13.85  | 21.43                   | 21.43          | 16.96                    | 16.96          | 20.44                           | 20.44          |
| $\omega$ 3/ $\omega$ 6            | 1.73   | 8.35                    | 8.35           | 4.79                     | 4.79           | 5.68                            | 5.68           |

\* includes FA measured as DMA, likely to resulting from vinyl bonds with glycerol. Bacterial FA are the sum of iso-, antiso, 10-Methyl and cyclo FA, 15:0, and 16:1 $\omega$ 8.

**Table S5.** Fatty acid (FA) composition of seston (fraction < 125  $\mu\text{m}$ ) and zooplankton crustacea in Poste pond. Reserve lipids are the sum of apolar and acetone mobile lipid fractions plus free fatty acids.

| Poste                             | Filter | Large Branchiopods          |                |
|-----------------------------------|--------|-----------------------------|----------------|
|                                   |        | <i>Tanymastix stagnales</i> |                |
|                                   |        | Reserve lipids              | Phospho-lipids |
| 10:0                              | 0.00   | 4.29                        | 0.00           |
| 12:0                              | 2.06   | 5.09                        | 1.71           |
| 14:0                              | 4.82   | 1.04                        | 0.72           |
| 16:0                              | 14.44  | 2.98                        | 5.67           |
| 18:0                              | 18.00  | 2.54                        | 2.34           |
| $\Sigma$ Saturated (without 15:0) | 40.32  | 17.58                       | 10.89          |
| 15:1 $\omega$ 8                   | 0.00   | 1.31                        | 0.00           |
| 16:1 $\omega$ 4 (Diatoms)         | 0.00   | 0.94                        | 0.00           |
| 16:1 $\omega$ 5 (Fungi)           | 3.60   | 0.00                        | 0.45           |
| 16:1 $\omega$ 7 *                 | 0.00   | 9.21                        | 21.44          |
| 16:1 $\omega$ 9 *                 | 0.00   | 1.60                        | 0.00           |
| 18:1 $\omega$ 7 *                 | 4.27   | 0.16                        | 4.63           |
| 18:1 $\omega$ 9 *                 | 8.76   | 1.91                        | 3.81           |
| $\Sigma$ Mono-unsaturated         | 31.03  | 28.99                       | 33.91          |
| $\Sigma$ Bacterial FA             | 28.69  | 18.09                       | 18.09          |
| 16:2 $\omega$ 4                   | 0.65   | 0.00                        | 0.00           |
| 16:3 $\omega$ 4                   | 0.00   | 0.00                        | 0.00           |
| 16:3 $\omega$ 6                   | 0.00   | 0.42                        | 0.00           |
| 18:2 $\omega$ 6                   | 7.74   | 0.86                        | 1.97           |
| 18:3 $\omega$ 3                   | 0.00   | 20.21                       | 32.20          |
| 20:4 $\omega$ 6                   | 0.00   | 0.00                        | 2.67           |
| 20:5 $\omega$ 3                   | 1.56   | 0.22                        | 6.52           |
| 22:5 $\omega$ 3                   | 0.00   | 0.39                        | 0.00           |
| 22:6 $\omega$ 3                   | 0.00   | 0.00                        | 0.40           |
| $\Sigma$ PUFA                     | 9.95   | 22.10                       | 43.76          |
| $\Sigma$ C>24                     | 0.00   | 3.91                        | 0.00           |
| $\Sigma\omega$ 3                  | 1.56   | 20.82                       | 20.82          |
| $\omega$ 3/ $\omega$ 6            | 0.20   | 16.34                       | 16.34          |

\* includes FA measured as DMA, likely to resulting from vinyl bonds with glycerol. Bacterial FA are the sum of iso-, antiso, 10-Methyl and cyclo FA, 15:0, and 16:1 $\omega$ 8.
